# Supplementary material for: Invisible Dimensions in Virtual Education: A Deeper Understanding of the Hidden Curriculum
Source: Research Square preprint supplement (doi:10.21203/rs.3.rs-6586364/v1), 2025-09-23
Supplement: Supplementary file 1 [file ad18b8588d9d0dfb4fe1aa96.docx]

Observation data collection form (synchronous learning))

| Row | Subject | Points to note |
| --- | --- | --- |
| 1 | Content | Start of class (how)  The content format and how it is presented  Interactive content  Use of (Multimedia  ) movies, podcasts,  Reviewing content references (learning from searching for resources and moving to a new learning space))  Content diversity  Content and teaching scheduling  Teaching discipline, responsibility, and time management and etc. in the content provided |
| 2 | Teaching-learning method | Educational Design  Teaching Method : Lectures and PowerPoint, flipped classroom, , group discussion  Time management  chat rooms  Review of Content  and Results  Asking questions randomly and ensuring their presence in the classroom  Carrying out a learning activity or assignment during teaching  Critical/Creative thinking  Paying attention to the individual characteristics of learners and their needs  Creating opportunities for exchange of ideas and collaborative learning |
| 3 | Interactions | Chatbox conversations  Questions and answers  How to respond to students' questions  How to ask learners questions  if the teacher’s and learners' cameras and microphones are turned turned on |
| 4 | Rules | Attendance and absence monitoring  Starting class on time  Following- up lack of Presenceof learners In Class  Responsibility ,Commitment  On-time attendance of the teacher and learners  Permission and Hand Rise |
| 5 | Support | Survey of learners regarding the quality of audio, video, and text  Existence of Facilitator Or Representative of the Class  Coordination of Learners regarding the Plat Form  Solution of the Problems Related to Working By Platform  Follow-up learners' curricular and extracurricular problems |
| 6 | feedback | Teacher's reaction to learners' written and spoken conversations  Teacher's reaction to students arriving late to class  Teacher's reaction to the lack of presence  How the teacher responds to learners' answers to the questions  Feedback by stickers  Reflection of teachers and students  Rewards and punishments  How to give feedback on teaching |
| 7 | creativity | Teacher (content, feedback, class management, virtual exam design and avoiding cheating)  class presentations  Creative content  Creative teaching |
| 8 | Assignments and Assessment | Type of assignments (analytical, etc  Self-tests  Self-assessment  Projects |
| 9 | The atmosphere in the classroom | The only Speaker  Two-way interactions  Learner and teacher stress  Class diversity  Passion and excitement  The level of intimacy and creating an emotional atmosphere |
| 10 | Justice | Paying attention to the differences between universities and content possibilities  Teachers treating all learners equally  Identical feedback from professors  Different reactions of teachers to some learners |
| 11 | Netiquette, religious education, ethics, and professional personality | Paying attention to all written texts (content, verbal conversations, written texts)  Conversations between teacher and learners  Conversations between learners  How to ask questions  How to respond  How to give feedback  Preserving Privacy of People  How to dress in front of the camera  Teaching morals and religion  Self-control and confidence in conversation  Cooperation and mutual respect  Professional culture |
