# Supplementary material for: Invisible Dimensions in Virtual Education: A Deeper Understanding of the Hidden Curriculum
Source: Research Square preprint supplement (doi:10.21203/rs.3.rs-6586364/v1), 2025-09-23
Supplement: Supplementary file 2 [file fe49e8f916ff221191cc04ec.docx]

Interview Guide: Exploring the Hidden Curriculum in Online Education

Introduction for the Interviewer:
This interview aims to explore participants’ experiences and perceptions of online education, focusing on differences in pedagogy, interaction, and hidden curriculum elements. Please feel free to ask follow-up questions when appropriate and encourage elaboration where needed.

## 1. Differences Between Online and Face-to-Face Courses

Primary Question:
- Have you noticed any differences between online courses' content and teaching methods compared to face-to-face courses? Please explain.

Follow-up Prompts:

- - Could you give examples of specific changes in content delivery or teaching strategies?
- - How do these differences affect your learning/teaching experience?

## 2. Unintended Learning in Virtual Education

Primary Question:
- What did you learn/teach in virtual education besides those related to your educational goals? Please give examples.

Follow-up Prompts:

- - Did you develop any new skills (e.g., time management, digital literacy, communication)?
- - Were there any surprising lessons or takeaways?

## 3. Interaction Between Students and Instructors

Primary Question:
- How would you assess the interaction between students and instructors in online courses?

Follow-up Prompts:

- - What platforms or tools were used to facilitate communication?
- - Was the level of engagement satisfactory from both sides?

## 4. Student Participation in Virtual Environments

Primary Question:
- Do you feel students participate as much in virtual environments as in face-to-face settings? Why or why not?

Follow-up Prompts:

- - Are there any factors that encourage or limit participation online?
- - How do students express engagement in a virtual classroom?

## 5. Challenges in Online Education

Primary Question:
- What are the biggest challenges you have faced in online education?

Follow-up Prompts:

- - Were these challenges related to technology, motivation, access, or other factors?

## 6. Unique Opportunities in Online Learning

Primary Question:
- Are there opportunities that online education can provide for learning that are not available in traditional face-to-face education? Please provide examples.

Follow-up Prompts:

- - Have you used any tools or platforms that significantly enhanced your experience?
- - Did online learning allow more flexibility or access to resources?

## 7. Suggestions for Improvement

Primary Question:
- As a teacher or student, what suggestions do you have for improving the quality of online educational programs?

Follow-up Prompts:

- - What changes would you recommend in content design, platform usability, or instructor training?

## 8. Hidden Curriculum in Online Education

Primary Question:
- Is there any other point or topic you think should be addressed regarding hidden curriculum components in online education?

Follow-up Prompts:

- - Have you noticed any unspoken rules, values, or behaviors that are taught or reinforced in online settings?

## Closing

Thank the interviewee for their time and insights. Ask if they would like to add any final thoughts or reflections about their experience with online education.
